# Supplementary material
Source: HighWire-hosted journal article supplement (https://www.cmajopen.ca/highwire/filestream/85274/field_highwire_adjunct_files/0/2020-0049-1-at.pdf)
Supplement: 2020-0049-1-at.pdf [file 2020-0049-1-at.pdf]

## Survey Instrument

### Introduction and Consent

#### Question 1

Young Adult Sex Workers' Sexual and Reproductive Health Needs. Thank you for your interest in our study! The survey should take about 20-25 minutes to complete, and it will have a real impact on the future of sexual and reproductive health for young adult sex workers in Toronto. This survey is intended for young adults between 18 and 29 years old who have experience selling or trading sex and who live, work, or access services in the Greater Toronto Area. This research project is a partnership between Planned Parenthood Toronto, the University of Toronto, and Maggie's: The Toronto Sex Workers Action Project. Please review the consent form on the next page for more information and to help you to decide whether or not you want to participate in this study.

#### Question 2

[Consent Form]

#### Question 3

By clicking the box below, I hereby consent to participate.

- I **consent** to participate in this study. (1)
- I **do not consent** to participate in this study. (0)

*The following three questions are to make sure you are eligible to participate in this study.*

#### Question 4

Do you live, work, or access health or social services in the Greater Toronto Area?

- Yes (1)
- No (0)

*Skip to end of survey if "Do you live, work, or access health or social services in the Greater Toronto Area?" = No.*

#### Question 5

Have you ever sold or traded sex?

- Yes (1)
- No (0)

*Skip to end of survey if "Have you ever sold or traded sex?" = No.*

#### Question 6

Are you between the ages of 18 and 29?

- Yes (1)
- No (2)

*Skip to end of survey if "Are you between the ages of 18 and 29?" = No.*

**The following questions will ask about your experiences selling or trading sex. If you prefer to not answer a question, you can just skip it.**

### **Question 7**

Have you sold or traded sex: (select all that apply)

- As an agency escort (1)
  - As a fetish worker (i.e. Pro-Domme/sub) (2)
  - As an independent escort (3)
  - As a massage parlor attendant (4)
  - As an outdoor worker (5)
  - Working for someone else (i.e. pimp, a manager) (6)
  - As a stripper (7)
  - As a porn performer (8)
  - As a sugar baby (9)
  - As a web cam host (10)
  - For food, a place to stay, drugs, alcohol, transportation, or other things you needed (11)
  - Other (Please specify) (12)
- 

### **Question 8**

At what age did you first sell or trade sex?

---

### **Question 9**

Approximately how many years of experience do you have selling or trading sex?

- Less than 1 year (1)
- 1-3 years (2)
- More than 3 years (3)
- More than 5 years (4)
- 10+ years (5)

### **Question 10**

Do you currently sell or trade sex?

- Yes (0)
- No (1)

*Skip to Question 12 if “Do you currently sell or trade sex?” = No.*

### **Question 11**

What type of sex work do you currently do? (select all that apply)

- I am an agency escort (1)
- I am a fetish worker (2)
- I am an independent escort (3)

- I am a massage parlour attendant (4)
  - I am an outdoor worker (5)
  - I work for someone else (i.e. a pimp, a manager) (6)
  - I am a porn performer (7)
  - I am a stripper (8)
  - I am a sugar baby (9)
  - I am a web cam host (10)
  - I exchange sex for things I need (11)
  - Other (Please specify) (12)
- 

### Question 12

What do/did you receive in exchange for your sexual services? (select all that apply)

- Money (1)
  - A place to stay (2)
  - Drugs or alcohol (3)
  - Food or other things I need (4)
  - Transportation (6)
  - Other (Please specify) (5)
- 

*The following questions will ask about experiences with sexual and reproductive health care. If you prefer to not answer a question, you can just skip it.*

### Question 13

Where do you usually go for sexual and reproductive health care? By this we mean things like STI and HIV tests, safer sex info, STI treatment, birth control, pap tests, and pregnancy tests (select all that apply).

- I go to a community health centre (1)
- I go to the emergency room (2)
- I go to the family doctor (3)
- I go to a walk-in clinic (4)
- I go to a private clinic (5)
- I don't have a regular source of health care (6)

### Question 14

Do you tell your health care providers about your sex work experience?

- Yes (0)
- Sometimes (3)
- No (2)

### Question 15

Please tell us how much you agree or disagree with the following statements:

- i. I have access to all of the sexual and reproductive health information I need.
  - Strongly disagree (1)
  - Disagree (2)

- I don't know (3)
  - Somewhat agree (4)
  - Agree (5)
  - Strongly agree (6)
- ii. I have access to all of the sexual and reproductive health services and programs that I need.
- Strongly disagree (1)
  - Disagree (2)
  - I don't know (3)
  - Somewhat agree (4)
  - Agree (5)
  - Strongly agree (6)

### Question 16

Here is a list of sexual and reproductive health topics **related to sex work**. Which topics do you think you need more information about? (select all that apply)

- Consent at work (1)
  - Criminalization and sexual health (2)
  - How to report violence or abuse that happened while I was working (3)
  - Intimate relationships and sex work (4)
  - Parenting info and support for sex workers (5)
  - Talking about sex work with friends and family (6)
  - Telling my health care provider that I am a sex worker (7)
  - I don't need any information (8)
  - Other (Please specify) (9)
- 

### Question 17

Here is a list of **general** sexual and reproductive health topics. Which topics do you think you need more information about? (select all that apply)

- Birth control options (1)
  - Condom negotiation in my personal sex life (2)
  - Consent in my personal sex life (3)
  - Free access to safer sex supplies such as condoms and lube (4)
  - Gender identity and/or sexual orientation (5)
  - HIV/AIDS (6)
  - Pregnancy testing and/or options (7)
  - Safer sex (8)
  - Sexual pleasure (9)
  - Sexually transmitted infections (20)
  - STI testing (11)
  - I don't need any more information (12)
  - Other (Please specify) (13)
-

### Question 18

These are some factors that can make it difficult for people to access sexual and reproductive health care services (select all that apply).

- My citizenship status (1)
  - The cost of things I need for my sexual health, like birth control, condoms, or other prescriptions (2)
  - I need child care (3)
  - I am concerned about my anonymity or confidentiality (4)
  - I feel emotional distress, depression, or anxiety (5)
  - I am worried about the police finding out (6)
  - I am worried about my social worker finding out (7)
  - I am worried about experiencing discrimination (e.g., racism, homophobia, transphobia, ableism) (8)
  - I am worried about my friends or family finding out (9)
  - I am worried that the health care provider would tell the police I am a sex worker (10)
  - I am worried that I will be harassed for being a sex worker (11)
  - I think health care providers are uninformed about sex workers (12)
  - I think health care providers judge with sex workers (13)
  - The location is inconvenient for me (14)
  - The hours are inconvenient for me (15)
  - I don't know about programs or services (16)
  - I don't have a health card (17)
  - I don't have access to my health card (18)
  - I haven't had difficulties accessing sexual and reproductive health services (19)
  - The services don't accommodate my accessibility needs (20)
  - Other (Please specify) (21)
- 

### Question 19

Have you had bad experiences trying to get health services that made you not want to go back?

- Yes (0)
- No (1)
- I don't know (2)

*If "Have you had bad experiences trying to get health services that made you not want to go back?" = Yes, please respond to the following question.*

### Question 20

Please describe the bad experiences you have had trying to get health services that made you not want to go back.

---

### Question 21

What would make you more likely to access sexual or reproductive health programs or services?  
(select all that apply)

- Anti-oppressive space (1)
  - Being involved in developing the program or service (2)
  - Convenient location (3)
  - Food (4)
  - Knowing that I will not be reported to the police, social worker, or CAS for my involvement in sex work (5)
  - Knowing other people who access the program/service (6)
  - Nonjudgmental staff and/or volunteers (7)
  - Physically accessible space (8)
  - Staff and/or volunteers who have sex work experience (9)
  - Staff and/or volunteers who are similar to me (i.e. age, gender identity, sexual identity, race) (10)
  - TTC tokens (11)
  - I don't want to access sexual or reproductive health programming or services (12)
  - Other (Please specify) (13)
- 

### Question 22

How would you like to get sexual and reproductive health information, education, and services?  
(select all that apply)

- Anonymous phone line (1)
  - Anonymous two-way texting service (2)
  - Email (3)
  - Live chat online (4)
  - Peer-led workshops (5)
  - Print resources, such as magazines or pamphlets (6)
  - Resources at my place or work (7)
  - Sexual health clinic downtown (8)
  - Sexual health clinic in my neighbourhood (9)
  - Sex work support organizations (10)
  - Smartphone app (11)
  - Social media (Facebook page or Twitter account) (12)
  - Website dedicated to sex workers' sexual health (13)
  - Other (Please specify) (14)
- 

### Question 23

What sexual or reproductive health programs or services do you, or other young adults involved in sex work in Toronto, need?

---

---

---

**Question 24**

How do you think young adult sex workers' sexual and reproductive health needs differ from the needs of other young adults who are not involved in sex work?

---

---

---

---

*The following questions will as about your experiences with criminalization and what you think about police. If you prefer to not answer a question, you can skip it.*

**Question 25**

Are you impacted by the laws around sex work?

- Yes (0)
- No (1)
- I don't know (2)

*If "Are you impacted by the laws around sex work?" = Yes, please respond to the following question.*

**Question 26**

Please describe how you are impacted by the laws surrounding sex work.

---

**Question 27**

Do laws that criminalize clients impact you?

- Yes (0)
- No (1)
- I don't know (3)

*If "Do laws the criminalize clients impact you?" = Yes, please respond to the following question.*

**Question 28**

Please explain how you are impacted by the laws that criminalize your clients.

---

**Question 29**

Do laws that criminalize people in your personal networks impact you (i.e. romantic partners, pimps, friends, family members)?

- Yes (0)
- No (1)
- I don't know (2)

*If “Do laws that criminalize people in your personal networks impact you (i.e. romantic partners, pimps, friends, family members)?” = Yes, please respond to the following question.*

**Question 30**

Please explain how you are impacted by the laws that criminalize people in your personal networks.

---

**Question 31**

Do you think you or young adult sex workers you know want more information about sex work related laws?

- Yes (0)
- No (1)
- I don't know (2)

**Question 32**

Please rate your level of agreement with the following statement:

|                                             | <b>Strongly Disagree</b> |    | <b>Neutral</b> |    | <b>Strongly Agree</b> |
|---------------------------------------------|--------------------------|----|----------------|----|-----------------------|
|                                             | 0                        | 25 | 50             | 75 | 100                   |
| I have a good relationship with the police. |                          |    |                |    |                       |

**Question 33**

Have you ever been in contact with municipal by-law officers? (i.e. at a massage parlour or strip club)

- Yes (0)
- No (1)
- I don't know (2)



**Question 34**

Would you call the police if you were:

|                              | Yes (1)                  | No (2)                   | I don't know (3)         |
|------------------------------|--------------------------|--------------------------|--------------------------|
| Robbed at work               | <input type="checkbox"/> | <input type="checkbox"/> | <input type="checkbox"/> |
| Sexually assaulted at work   | <input type="checkbox"/> | <input type="checkbox"/> | <input type="checkbox"/> |
| Stalked at work              | <input type="checkbox"/> | <input type="checkbox"/> | <input type="checkbox"/> |
| Physically assaulted at work | <input type="checkbox"/> | <input type="checkbox"/> | <input type="checkbox"/> |

*If “Would you call the police if you were...” = Yes, please respond to the following question.*

**Question 35**

Why would you not call the police? (select all that apply)

- The police don't care about me (1)
  - I don't trust the police (2)
  - I would rather deal with it on my own (3)
  - Other (4)
- 

**Question 36**

Have you ever had a negative experience with a police officer?

- Yes (0)
- No (1)

*If “Have you ever had a negative experience with a police office?” = Yes, please respond to the following question.*

**Question 37**

Please describe your negative experience with a police officer.

---

**Question 38**

Are you comfortable going to the police if you need protection?

- Yes (0)
- No (1)

**Question 39**

Are you comfortable going to the social worker if you need help?

Yes (0)

No (1)

**Question 40**

Do you share your involvement in sex work with your:

|                              | Yes (0)                  | No (1)                   | Sometimes (2)            | Does not apply to me (3) |
|------------------------------|--------------------------|--------------------------|--------------------------|--------------------------|
| Friends                      | <input type="checkbox"/> | <input type="checkbox"/> | <input type="checkbox"/> | <input type="checkbox"/> |
| Family                       | <input type="checkbox"/> | <input type="checkbox"/> | <input type="checkbox"/> | <input type="checkbox"/> |
| Serious/Long-term Partner(s) | <input type="checkbox"/> | <input type="checkbox"/> | <input type="checkbox"/> | <input type="checkbox"/> |
| Casual/sexual partner        | <input type="checkbox"/> | <input type="checkbox"/> | <input type="checkbox"/> | <input type="checkbox"/> |

**Question 41**

You can count on your sex work colleagues and peers...

|                                                 | Strongly Disagree (1)    | Disagree (2)             | Agree (3)                | Strongly Agree (4)       | Does not apply to me (5) |
|-------------------------------------------------|--------------------------|--------------------------|--------------------------|--------------------------|--------------------------|
| if you need to borrow money                     | <input type="checkbox"/> | <input type="checkbox"/> | <input type="checkbox"/> | <input type="checkbox"/> | <input type="checkbox"/> |
| to accompany you to the doctor or hospital      | <input type="checkbox"/> | <input type="checkbox"/> | <input type="checkbox"/> | <input type="checkbox"/> | <input type="checkbox"/> |
| if you need to talk about your problems         | <input type="checkbox"/> | <input type="checkbox"/> | <input type="checkbox"/> | <input type="checkbox"/> | <input type="checkbox"/> |
| if you need advice or mentorship                | <input type="checkbox"/> | <input type="checkbox"/> | <input type="checkbox"/> | <input type="checkbox"/> | <input type="checkbox"/> |
| if you need somewhere to stay                   | <input type="checkbox"/> | <input type="checkbox"/> | <input type="checkbox"/> | <input type="checkbox"/> | <input type="checkbox"/> |
| to help deal with a violent or difficult client | <input type="checkbox"/> | <input type="checkbox"/> | <input type="checkbox"/> | <input type="checkbox"/> | <input type="checkbox"/> |
| to share techniques about safer sex             | <input type="checkbox"/> | <input type="checkbox"/> | <input type="checkbox"/> | <input type="checkbox"/> | <input type="checkbox"/> |

**Question 42**

Please tell us how much you agree or disagree with the following statements:

|                                                                        | Strongly Disagree (1)    | Disagree (2)             | Agree (3)                | Strongly Agree (4)       | Does not apply to me (5) |
|------------------------------------------------------------------------|--------------------------|--------------------------|--------------------------|--------------------------|--------------------------|
| In general, the people I work with only worry about themselves         | <input type="checkbox"/> | <input type="checkbox"/> | <input type="checkbox"/> | <input type="checkbox"/> | <input type="checkbox"/> |
| The people I work with are a connected group                           | <input type="checkbox"/> | <input type="checkbox"/> | <input type="checkbox"/> | <input type="checkbox"/> | <input type="checkbox"/> |
| In general, the people I work with are always arguing among each other | <input type="checkbox"/> | <input type="checkbox"/> | <input type="checkbox"/> | <input type="checkbox"/> | <input type="checkbox"/> |
| I can trust the majority of the people working in my field             | <input type="checkbox"/> | <input type="checkbox"/> | <input type="checkbox"/> | <input type="checkbox"/> | <input type="checkbox"/> |
| In general, the people I work with get along well                      | <input type="checkbox"/> | <input type="checkbox"/> | <input type="checkbox"/> | <input type="checkbox"/> | <input type="checkbox"/> |

**Question 43**

What do you like most about sex work?

---

---

---

---

**Question 44**

What do you like least about sex work?

---

---

---

---

**Question 45**

What are your sources of strength and resilience?

---

---

---

---

*The following questions ask about your life experiences. If you prefer to not answer a question, you can just skip it. Please remember that all of your responses to the survey are anonymous and confidential.*

**Question 46**

How old are you?

---

**Question 47**

What is your gender identity? (select all that apply)

- Agender (1)
  - Bigender (2)
  - Genderqueer (3)
  - Intersex (4)
  - Man (5)
  - Non-binary (6)
  - Trans (7)
  - Two Spirit (8)
  - Woman (9)
  - None of these options fully describe my gender identity. I identify as:  
(10)
- 

**Question 48**

What is your sexual identity? (select all that apply)

- Asexual (1)
- Bisexual (2)

- Demisexual (3)
  - Gay (4)
  - Heterosexual/Straight (5)
  - Lesbian (6)
  - Man who has sex with men (MSM) (7)
  - Pansexual (8)
  - Queer (9)
  - Questioning (10)
  - Two Spirit (11)
  - Woman who has sex with women (WSW) (12)
  - None of these options fully describe my sexual identity. My sexual identity is:  
(13)
- 

### Question 49

Were you born in Canada?

- Yes (1)
- No (0)

### Question 50

How would you describe your racial identity? (select all that apply)

- African (1)
  - Arab (2)
  - Black (3)
  - Caribbean (4)
  - Central Asian (5)
  - East Asian (6)
  - Indigenous/Aboriginal (7)
  - Latin American (8)
  - Mixed Race (9)
  - South Asian (10)
  - Southeast Asian (11)
  - White (12)
  - None of these options fully describe my ethnic or racial identity. My ethnic or racial identity is:  
(14)
- 

### Question 51

How would you describe your housing situation?

- I do not have a place to live (1)
  - I stay at a shelter (2)
  - I stay with friends (3)
  - I have stable housing (4)
  - Other (5)
-

**Question 52**

Do you have children in your care?

- Yes (0)
- No (1)
- I have children but they are not in my care (2)

**Question 53**

There are many kinds of life experiences that may affect a person's health or their access to programs and services. In order for us to better meet your needs, we would appreciate knowing if your life has included the following experiences:

|                                                                         | Yes (Currently) (0)      | Yes (In the Past) (3)    | No (2)                   |
|-------------------------------------------------------------------------|--------------------------|--------------------------|--------------------------|
| Abuse (physical, psychological, emotional or sexual)                    | <input type="checkbox"/> | <input type="checkbox"/> | <input type="checkbox"/> |
| Being a parent                                                          | <input type="checkbox"/> | <input type="checkbox"/> | <input type="checkbox"/> |
| Being a refugee                                                         | <input type="checkbox"/> | <input type="checkbox"/> | <input type="checkbox"/> |
| Being in the criminal justice system due to sex work related offences   | <input type="checkbox"/> | <input type="checkbox"/> | <input type="checkbox"/> |
| Being in the criminal justice system for issues not related to sex work | <input type="checkbox"/> | <input type="checkbox"/> | <input type="checkbox"/> |
| Chronic illness                                                         | <input type="checkbox"/> | <input type="checkbox"/> | <input type="checkbox"/> |
| Disability                                                              | <input type="checkbox"/> | <input type="checkbox"/> | <input type="checkbox"/> |
| Drug or alcohol use that caused problems for me                         | <input type="checkbox"/> | <input type="checkbox"/> | <input type="checkbox"/> |
| Fear of criminalization                                                 | <input type="checkbox"/> | <input type="checkbox"/> | <input type="checkbox"/> |
| Food insecurity or hunger                                               | <input type="checkbox"/> | <input type="checkbox"/> | <input type="checkbox"/> |
| Having a home I didn't want to return to or was forced to leave         | <input type="checkbox"/> | <input type="checkbox"/> | <input type="checkbox"/> |

|                                                  |                          |                          |                          |
|--------------------------------------------------|--------------------------|--------------------------|--------------------------|
| Homelessness                                     | <input type="checkbox"/> | <input type="checkbox"/> | <input type="checkbox"/> |
| Involvement with child protective services (CAS) | <input type="checkbox"/> | <input type="checkbox"/> | <input type="checkbox"/> |
| Leaving/being forced to leave school early       | <input type="checkbox"/> | <input type="checkbox"/> | <input type="checkbox"/> |
| Living with HIV/AIDS                             | <input type="checkbox"/> | <input type="checkbox"/> | <input type="checkbox"/> |
| Mental health issues that caused problems for me | <input type="checkbox"/> | <input type="checkbox"/> | <input type="checkbox"/> |
| Unstable housing                                 | <input type="checkbox"/> | <input type="checkbox"/> | <input type="checkbox"/> |
| Violence from a sex work client                  | <input type="checkbox"/> | <input type="checkbox"/> | <input type="checkbox"/> |

**Question 54**

Please tell us about anything that you, or other young adult sex workers, need for your sexual and reproductive health that you aren't currently able to get?

---



---



---



---

**Question 55**

Do you have any suggestions for health care professionals who work with young adult sex workers?

---



---



---



---

**Question 56**

Planned Parenthood Toronto

|                                                             | Not at all (1)           | A little bit (2)         | Somewhat (3)             | Very (4)                 | I don't know about it (5) |
|-------------------------------------------------------------|--------------------------|--------------------------|--------------------------|--------------------------|---------------------------|
| I am <i>familiar with</i> Planned Parenthood Toronto        | <input type="checkbox"/> | <input type="checkbox"/> | <input type="checkbox"/> | <input type="checkbox"/> | <input type="checkbox"/>  |
| I am <i>comfortable going to</i> Planned Parenthood Toronto | <input type="checkbox"/> | <input type="checkbox"/> | <input type="checkbox"/> | <input type="checkbox"/> | <input type="checkbox"/>  |
